# Supplementary material
Source: PubMed Central journal article supplement (PMC4326687)
Supplement: NIHMS649436-supplement-Graphical_Abstract.pdf [file NIHMS649436-supplement-Graphical_Abstract.pdf]

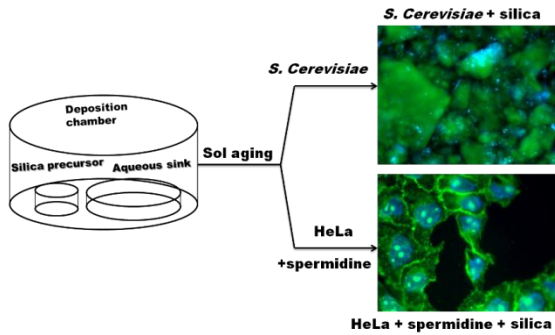

Silica sols are generated via vapor deposition of tetramethyl orthosilicate (TMOS) into an aqueous medium. Subsequent mixing, under various experimental conditions, of eukaryotic and mammalian cell types with silica sols results in encapsulation of cells in tunable silica structures (represented by green fluorescence).
